# Supplementary material for: Comparison of the Fatty Acid and Triglyceride Profiles of Big Eye Tuna (Thunnus obesus), Atlantic salmon (Salmo salar) and Bighead Carp (Aristichthysnobilis) Heads
Source: MDPI journal article supplement (doi:10.3390/molecules24213983), 2019-11-04
Supplement: s1 [file s1]

Table S1. Fatty acids profiles of total lipids in three fish heads (g/100g, mean  $\pm$  S.D., n=3)

| Fatty acid                     | Big eye tuna                                  | Atlantic salmon                               | Big head carp                                |
|--------------------------------|-----------------------------------------------|-----------------------------------------------|----------------------------------------------|
| C4:0                           | 0.92 $\pm$ 0.61 <sup>a</sup>                  | 0.16 $\pm$ 0.16 <sup>c</sup>                  | 0.27 $\pm$ 0.36 <sup>b</sup>                 |
| C14:0                          | 0.94 $\pm$ 0.85 <sup>a</sup>                  | 0.32 $\pm$ 0.12 <sup>c</sup>                  | 0.59 $\pm$ 0.30 <sup>b</sup>                 |
| C15:0                          | 0.50 $\pm$ 0.44 <sup>b</sup>                  | 0.48 $\pm$ 0.42 <sup>b</sup>                  | 0.74 $\pm$ 0.76 <sup>a</sup>                 |
| C16:0                          | 3.49 $\pm$ 0.34 <sup>a</sup>                  | 3.82 $\pm$ 0.21 <sup>a</sup>                  | 2.99 $\pm$ 1.60 <sup>b</sup>                 |
| C17:0                          | 1.56 $\pm$ 0.29 <sup>a</sup>                  | 0.06 $\pm$ 0.06 <sup>c</sup>                  | 0.40 $\pm$ 0.45 <sup>b</sup>                 |
| C18:0                          | 1.80 $\pm$ 0.27 <sup>a</sup>                  | 0.66 $\pm$ 0.66 <sup>b</sup>                  | 0.34 $\pm$ 0.49 <sup>c</sup>                 |
| C20:0                          | 0.11 $\pm$ 0.12 <sup>b</sup>                  | 0.21 $\pm$ 0.03 <sup>a</sup>                  | 0.03 $\pm$ 0.05 <sup>c</sup>                 |
| C21:0                          | 0.06 $\pm$ 0.10 <sup>c</sup>                  | 0.79 $\pm$ 0.79 <sup>b</sup>                  | 1.58 $\pm$ 2.30 <sup>a</sup>                 |
| C22:0                          | 0.20 $\pm$ 0.18 <sup>b</sup>                  | 0.10 $\pm$ 0.06 <sup>b</sup>                  | 1.25 $\pm$ 1.94 <sup>a</sup>                 |
| C23:0                          | 1.06 $\pm$ 0.40 <sup>a</sup>                  | 0.03 $\pm$ 0.03 <sup>c</sup>                  | 0.68 $\pm$ 0.41 <sup>b</sup>                 |
| C24:0                          | 0.09 $\pm$ 0.05 <sup>b</sup>                  | 0.01 $\pm$ 0.01 <sup>b</sup>                  | 0.52 $\pm$ 0.25 <sup>a</sup>                 |
| <b><math>\Sigma</math>SFA</b>  | <b>10.73<math>\pm</math>3.65<sup>a</sup></b>  | <b>6.64<math>\pm</math>2.55<sup>b</sup></b>   | <b>9.39<math>\pm</math>8.91<sup>a</sup></b>  |
| C14:1                          | 0.39 $\pm$ 0.10 <sup>c</sup>                  | 1.28 $\pm$ 1.25 <sup>a</sup>                  | 0.89 $\pm$ 0.94 <sup>b</sup>                 |
| C15:1                          | 1.34 $\pm$ 0.23 <sup>a</sup>                  | 0.19 $\pm$ 0.07 <sup>c</sup>                  | 0.70 $\pm$ 0.49 <sup>b</sup>                 |
| C16:1                          | 3.03 $\pm$ 1.14 <sup>c</sup>                  | 17.49 $\pm$ 8.97 <sup>b</sup>                 | 27.42 $\pm$ 4.36 <sup>a</sup>                |
| C17:1                          | 0.76 $\pm$ 0.33 <sup>c</sup>                  | 2.01 $\pm$ 2.00 <sup>a</sup>                  | 1.09 $\pm$ 0.28 <sup>b</sup>                 |
| C18:1N9                        | 2.78 $\pm$ 1.79 <sup>b</sup>                  | 5.66 $\pm$ 1.77 <sup>a</sup>                  | 6.68 $\pm$ 0.72 <sup>a</sup>                 |
| C20:1                          | 0.66 $\pm$ 1.14 <sup>c</sup>                  | 6.33 $\pm$ 1.94 <sup>a</sup>                  | 2.74 $\pm$ 0.80 <sup>b</sup>                 |
| C22:1N9                        | 0.45 $\pm$ 0.62 <sup>a</sup>                  | 0.12 $\pm$ 0.01 <sup>c</sup>                  | 0.58 $\pm$ 0.69 <sup>a</sup>                 |
| C24:1                          | 0.74 $\pm$ 0.37 <sup>a</sup>                  | 0.43 $\pm$ 0.18 <sup>b</sup>                  | 0.30 $\pm$ 0.27 <sup>b</sup>                 |
| <b><math>\Sigma</math>MUFA</b> | <b>10.15<math>\pm</math>5.72<sup>c</sup></b>  | <b>33.51<math>\pm</math>16.19<sup>b</sup></b> | <b>40.4<math>\pm</math>8.55<sup>a</sup></b>  |
| C18:2N6                        | 0.95 $\pm$ 0.43 <sup>c</sup>                  | 5.84 $\pm$ 1.44 <sup>a</sup>                  | 1.22 $\pm$ 1.01 <sup>b</sup>                 |
| C18:3N6                        | 0.91 $\pm$ 0.51 <sup>b</sup>                  | 5.42 $\pm$ 2.01 <sup>a</sup>                  | 0.16 $\pm$ 0.03 <sup>c</sup>                 |
| C18:3N3                        | 0.21 $\pm$ 0.36 <sup>b</sup>                  | 0.07 $\pm$ 0.07 <sup>c</sup>                  | 1.55 $\pm$ 0.58 <sup>a</sup>                 |
| C20:2                          | 0.30 $\pm$ 0.33 <sup>b</sup>                  | 1.78 $\pm$ 0.65 <sup>a</sup>                  | 0.48 $\pm$ 0.28 <sup>b</sup>                 |
| C20:3N6                        | 0.06 $\pm$ 0.03 <sup>c</sup>                  | 5.79 $\pm$ 2.82 <sup>a</sup>                  | 0.43 $\pm$ 0.47 <sup>b</sup>                 |
| C20:3N3                        | 0.61 $\pm$ 0.68 <sup>a</sup>                  | 0.09 $\pm$ 0.09 <sup>b</sup>                  | 0.59 $\pm$ 0.23 <sup>a</sup>                 |
| C20:4N6                        | 1.06 $\pm$ 0.40 <sup>a</sup>                  | 0.03 $\pm$ 0.03 <sup>c</sup>                  | 0.62 $\pm$ 0.51 <sup>b</sup>                 |
| C22:2                          | 0.31 $\pm$ 0.11 <sup>c</sup>                  | 1.12 $\pm$ 0.61 <sup>b</sup>                  | 2.24 $\pm$ 0.42 <sup>a</sup>                 |
| C20:5N3                        | 8.83 $\pm$ 0.82 <sup>a</sup>                  | 4.18 $\pm$ 1.03 <sup>c</sup>                  | 5.15 $\pm$ 1.37 <sup>b</sup>                 |
| C22:6N3                        | 36.67 $\pm$ 1.21 <sup>a</sup>                 | 6.39 $\pm$ 1.3 <sup>b</sup>                   | 3.13 $\pm$ 1.14 <sup>c</sup>                 |
| <b>EPA+DHA</b>                 | <b>45.51<math>\pm</math>2.03<sup>a</sup></b>  | <b>10.57<math>\pm</math>2.33<sup>b</sup></b>  | <b>8.28<math>\pm</math>2.51<sup>c</sup></b>  |
| <b><math>\Sigma</math>PUFA</b> | <b>49.91<math>\pm</math>4.88<sup>a</sup></b>  | <b>30.71<math>\pm</math>10.05<sup>b</sup></b> | <b>15.57<math>\pm</math>6.04<sup>c</sup></b> |
| <b>TFA</b>                     | <b>70.79<math>\pm</math>14.25<sup>a</sup></b> | <b>70.86<math>\pm</math>28.79<sup>a</sup></b> | <b>65.36<math>\pm</math>23.5<sup>a</sup></b> |

<sup>a-d</sup> values in the same column with different lower-case letters are significantly different at  $P < 0.05$ .

Table S2. Fatty acids profiles of TG fraction in three fish heads. (g/100g, mean  $\pm$  S.D., n=3)

| Fatty Acid     | Big eye tuna                                  | Atlantic salmon                              | Big head Carp                                 |
|----------------|-----------------------------------------------|----------------------------------------------|-----------------------------------------------|
| C4:0           | 2.07 $\pm$ 1.01 <sup>b</sup>                  | 20.89 $\pm$ 7.32 <sup>a</sup>                | 1.75 $\pm$ 1.08 <sup>c</sup>                  |
| C14:0          | 1.72 $\pm$ 0.47 <sup>a</sup>                  | 0.65 $\pm$ 0.38 <sup>b</sup>                 | 5.18 $\pm$ 0.92 <sup>a</sup>                  |
| C15:0          | N. D.                                         | 0.96 $\pm$ 1.53 <sup>b</sup>                 | N. D.                                         |
| C16:0          | 0.1 $\pm$ 0.03 <sup>c</sup>                   | 4.47 $\pm$ 0.77 <sup>a</sup>                 | 0.38 $\pm$ 0.15 <sup>b</sup>                  |
| C17:0          | 1.02 $\pm$ 0.04 <sup>a</sup>                  | 0.03 $\pm$ 0.00 <sup>d</sup>                 | N. D.                                         |
| C18:0          | N. D.                                         | 2.31 $\pm$ 0.27 <sup>b</sup>                 | N. D.                                         |
| C20:0          | 0.09 $\pm$ 0.02 <sup>b</sup>                  | 0.03 $\pm$ 0.03 <sup>b</sup>                 | 0.07 $\pm$ 0.05 <sup>b</sup>                  |
| C22:0          | 0.08 $\pm$ 0.02 <sup>b</sup>                  | 0.03 $\pm$ 0.00 <sup>b</sup>                 | 0.23 $\pm$ 0.10 <sup>a</sup>                  |
| C23:0          | N. D.                                         | 0.01 $\pm$ 0.01 <sup>c</sup>                 | N. D.                                         |
| C24:0          | 2.78 $\pm$ 0.65 <sup>b</sup>                  | N. D.                                        | 5.34 $\pm$ 1.75 <sup>a</sup>                  |
| <b>SFA</b>     | <b>7.86<math>\pm</math>1.88<sup>d</sup></b>   | <b>27.04<math>\pm</math>8.57<sup>a</sup></b> | <b>12.95<math>\pm</math>4.05<sup>b</sup></b>  |
| C14:1          | 0.83 $\pm$ 0.23 <sup>a</sup>                  | 0.02 $\pm$ 0.01 <sup>c</sup>                 | 1.68 $\pm$ 0.48 <sup>a</sup>                  |
| C15:1          | 2.69 $\pm$ 1.96 <sup>a</sup>                  | N. D.                                        | 3.62 $\pm$ 3.86 <sup>a</sup>                  |
| C16:1          | 18.21 $\pm$ 4.62 <sup>a</sup>                 | 1.15 $\pm$ 0.16 <sup>a</sup>                 | 16.05 $\pm$ 11.11 <sup>a</sup>                |
| C17:1          | 2.2 $\pm$ 0.52 <sup>b</sup>                   | N. D.                                        | 2.24 $\pm$ 1.40 <sup>a</sup>                  |
| C18:1N9        | 14.85 $\pm$ 3.62 <sup>a</sup>                 | 24.47 $\pm$ 9.34 <sup>a</sup>                | 16.6 $\pm$ 4.79 <sup>a</sup>                  |
| C20:1          | 0.18 $\pm$ 0.24 <sup>b</sup>                  | 3.04 $\pm$ 0.91 <sup>c</sup>                 | 9.26 $\pm$ 2.30 <sup>a</sup>                  |
| C22:1N9        | 0.15 $\pm$ 0.04 <sup>a</sup>                  | N. D.                                        | 0.24 $\pm$ 0.10 <sup>a</sup>                  |
| C24:1          | N. D.                                         | 0.13 $\pm$ 0.05 <sup>b</sup>                 | N. D.                                         |
| <b>MUFA</b>    | <b>38.97<math>\pm</math>10.8<sup>a</sup></b>  | <b>28.81<math>\pm</math>4.57<sup>a</sup></b> | <b>49.69<math>\pm</math>24.04<sup>a</sup></b> |
| C18:2N6        | 0.54 $\pm$ 0.15 <sup>c</sup>                  | 11.10 $\pm$ 1.45 <sup>a</sup>                | 4.00 $\pm$ 3.05 <sup>b</sup>                  |
| C18:3N3        | 1.64 $\pm$ 0.38 <sup>a</sup>                  | 1.34 $\pm$ 0.56 <sup>a</sup>                 | 0.34 $\pm$ 0.08 <sup>b</sup>                  |
| C18:3N6        | 0.08 $\pm$ 0.05 <sup>b</sup>                  | N. D.                                        | 1.24 $\pm$ 0.96 <sup>a</sup>                  |
| C20:2          | 0.25 $\pm$ 0.07 <sup>c</sup>                  | 0.89 $\pm$ 0.22 <sup>a</sup>                 | 1.07 $\pm$ 0.54 <sup>a</sup>                  |
| C20:3N6        | 0.08 $\pm$ 0.05 <sup>b</sup>                  | 0.43 $\pm$ 0.13 <sup>b</sup>                 | 0.23 $\pm$ 0.14 <sup>a</sup>                  |
| C20:3N3        | 1.94 $\pm$ 0.46 <sup>a</sup>                  | 0.93 $\pm$ 0.01 <sup>a</sup>                 | 3.96 $\pm$ 1.58 <sup>a</sup>                  |
| C20:4N6        | N. D.                                         | 0.15 $\pm$ 0.03 <sup>b</sup>                 | N. D.                                         |
| C22:2          | 0.18 $\pm$ 0.05 <sup>a</sup>                  | 0.36 $\pm$ 0.01 <sup>a</sup>                 | 1.25 $\pm$ 0.93 <sup>a</sup>                  |
| C20:5          | 0.68 $\pm$ 0.19 <sup>c</sup>                  | 1.56 $\pm$ 0.34 <sup>c</sup>                 | 0.08 $\pm$ 0.08 <sup>b</sup>                  |
| C22:6          | 24.47 $\pm$ 5.92 <sup>a</sup>                 | 1.81 $\pm$ 0.26 <sup>c</sup>                 | 5.29 $\pm$ 2.38 <sup>b</sup>                  |
| <b>EPA+DHA</b> | <b>25.15<math>\pm</math>6.11</b>              | <b>3.37<math>\pm</math>0.6</b>               | <b>5.37<math>\pm</math>2.46</b>               |
| <b>PUFA</b>    | <b>29.92<math>\pm</math>7.21<sup>a</sup></b>  | <b>18.57<math>\pm</math>2.55<sup>b</sup></b> | <b>17.46<math>\pm</math>9.74<sup>a</sup></b>  |
| <b>TFA</b>     | <b>76.75<math>\pm</math>19.55<sup>a</sup></b> | <b>74.42<math>\pm</math>7.08<sup>a</sup></b> | <b>80.1<math>\pm</math>37.83<sup>a</sup></b>  |

N. D., not detected.

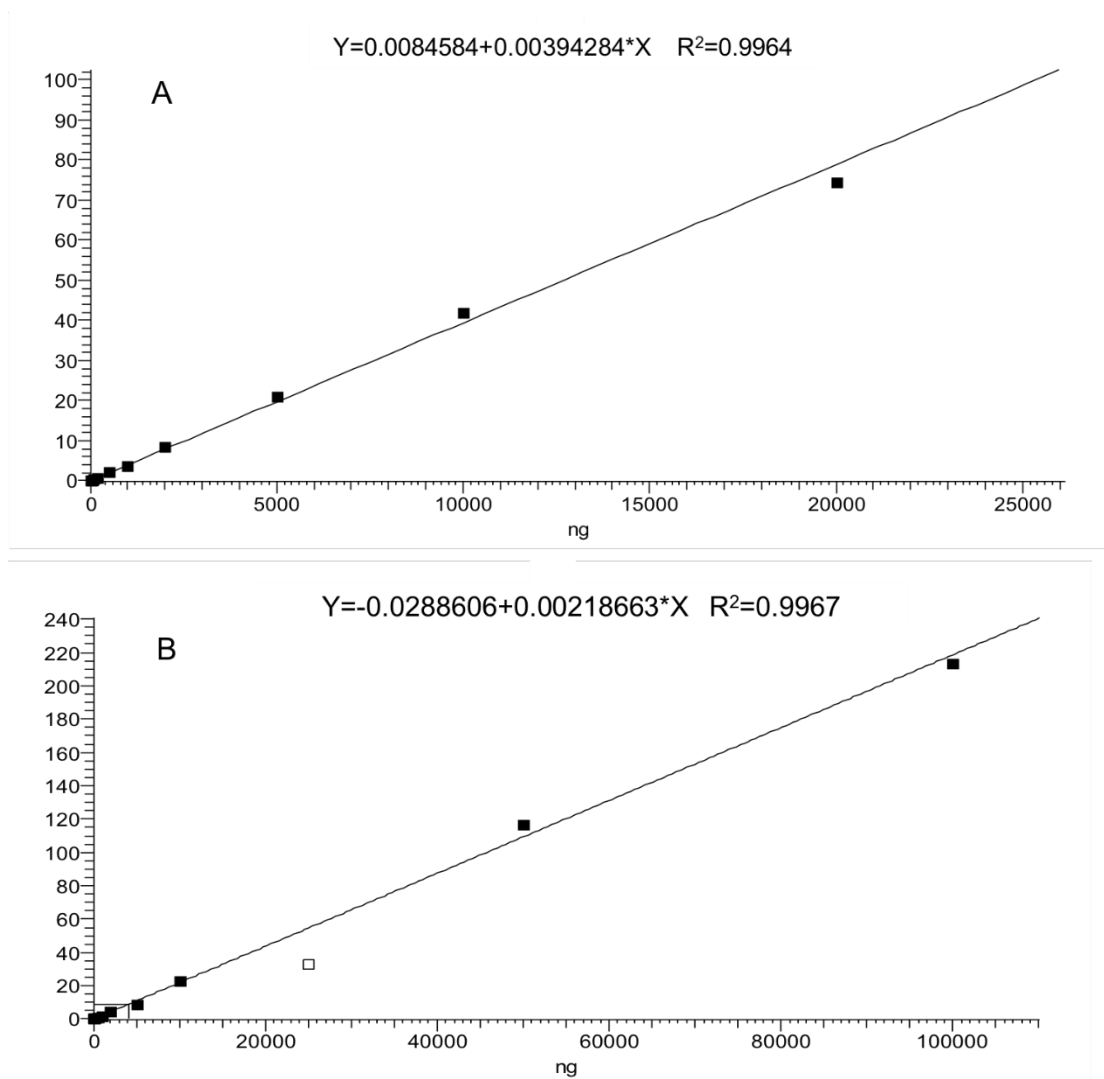

Figure S1. (A) Calibration curve of TG from big eye tuna head using TG (18:18:1/18:0) as external standard and TG (16:0/18:0/16:0)-d5 as the internal standard, a total of 13 points were prepared to cover the peak area ratio of internal standard and external standard, injection volume is 1 $\mu$ L. (B) Calibration curve of TG from Atlantic salmon and big head carp heads using TG (18:18:1/18:0) as external standard and TG (16:0/18:0/16:0)-d5 as the internal standard, a total of 13 points were prepared to cover the peak area ratio of internal standard and external standard, injection volume is 1 $\mu$ L.
